# Supplementary material for: Virus neutralization of SARS-CoV-2 Omicron variant BA.2 in those vaccinated with three doses of BNT162b2 or CoronaVac vaccines.
Source: Research Square preprint supplement (doi:10.21203/rs.3.rs-1331606/v1), 2022-02-08
Supplement: Supplementary file 2 [file 083265b6a00f9f0b8e5f4516.xlsx]

## Sheet: Sheet1
Unicodes	Subject no.	Group	Age	Sex	3rd_dose_date	Date_collection	WT PRNT90	WT PRNT50	BA.1 PRNT90	BA.1 PRNT50	BA.2 PRNT90	BA.2 PRNT50
LRS0271S-A	LRS0271	BN162b2 (3 doses)	40-49	M	2021-11-13	2021-12-13	320	320	20	80	40	80
LRS0272S-A	LRS0272	BN162b2 (3 doses)	70-79	M	2021-11-06	2021-12-13	320	320	20	80	20	80
LRS0274S-A	LRS0274	BN162b2 (3 doses)	60-69	M	2021-11-13	2021-12-14	320	320	40	160	40	160
LRS0275S-A	LRS0275	BN162b2 (3 doses)	60-69	F	2021-11-21	2021-12-14	320	320	20	40	10	40
LRS0277S-A	LRS0277	BN162b2 (3 doses)	60-69	M	2021-11-21	2021-12-16	320	320	40	80	40	80
VSC2148S	VA057	BN162b2 (3 doses)	40-49	M	2021-11-23	2021-12-17	320	320	40	80	40	80
VSC2151S	VA333	BN162b2 (3 doses)	50-59	F	2021-11-16	2021-12-17	320	320	20	40	20	80
VSC2153S	VA1002	BN162b2 (3 doses)	60-69	M	2021-11-14	2021-12-17	320	320	80	320	80	160
VSC2158S	VA1007	BN162b2 (3 doses)	40-49	F	2021-11-14	2021-12-17	320	320	80	160	40	160
VSC2159S	VA1008	BN162b2 (3 doses)	40-49	F	2021-11-20	2021-12-17	320	320	20	80	20	80
VSC2160S	VA1009	BN162b2 (3 doses)	30-39	F	2021-11-19	2021-12-17	320	320	80	160	80	320
VSC2170S	VA029	BN162b2 (3 doses)	40-49	M	2021-11-15	2021-12-20	320	320	10	40	20	80
VSC2171S	VA063	BN162b2 (3 doses)	20-29	F	2021-11-23	2021-12-20	160	320	20	80	20	80
VSC2174S	VA223	BN162b2 (3 doses)	60-69	M	2021-11-29	2021-12-20	160	320	5	20	10	40
VSC2177S	VA326	BN162b2 (3 doses)	30-39	F	2021-11-16	2021-12-20	320	320	40	160	40	160
VSC2180S	VA005	BN162b2 (3 doses)	40-49	F	2021-11-18	2021-12-21	160	320	5	10	20	80
VSC2181S	VA056	BN162b2 (3 doses)	30-39	M	2021-11-29	2021-12-21	160	320	20	40	20	40
VSC2189S	VA261	BN162b2 (3 doses)	50-59	F	2021-11-24	2021-12-22	160	320	10	20	40	160
VSC2201S	VA134	BN162b2 (3 doses)	30-39	M	2021-11-29	2021-12-28	320	320	20	80	40	160
VSC2214S	VA236	BN162b2 (3 doses)	60-69	M	2021-11-22	2021-12-29	320	320	20	80	40	80
VSC1354S	VA123	CoronaVac (2 dose+BNT162b2 booster)	40-49	F	18/8/2021	2021-09-15	320	320	40	160	40	160
VSC1356S	VA394	CoronaVac (2 dose+BNT162b2 booster)	40-49	F	18/8/2021	2021-09-15	160	320	10	40	20	40
VSC1499S	VA231	CoronaVac (2 dose+BNT162b2 booster)	50-59	M	18/8/2021	2021-09-17	160	320	20	80	5	10
VSC1501S	VA238	CoronaVac (2 dose+BNT162b2 booster)	40-49	M	18/8/2021	2021-09-17	320	320	40	160	40	160
VSC1502S	VA256	CoronaVac (2 dose+BNT162b2 booster)	50-59	M	18/8/2021	2021-09-17	160	320	10	40	20	40
VSC1504S	VA304	CoronaVac (2 dose+BNT162b2 booster)	40-49	F	18/8/2021	2021-09-17	160	320	10	40	20	80
VSC1510S	VA331	CoronaVac (2 dose+BNT162b2 booster)	40-49	F	18/8/2021	2021-09-20	160	320	80	320	20	80
VSC1585S	VA417	CoronaVac (2 dose+BNT162b2 booster)	50-59	F	24/8/2021	2021-09-23	320	320	10	40	10	40
VSC1606S	VA749	CoronaVac (2 dose+BNT162b2 booster)	30-39	M	2021-08-24	2021-09-24	80	320	10	20	10	40
VSC1635S	VA207	CoronaVac (2 dose+BNT162b2 booster)	60-69	M	2021-08-24	2021-09-29	320	320	5	20	5	20
VSC1710S	VA431	CoronaVac (2 dose+BNT162b2 booster)	40-49	F	2021-09-16	2021-10-15	160	320	10	40	20	40
VSC1715S	VA456	CoronaVac (2 dose+BNT162b2 booster)	40-49	M	2021-09-16	2021-10-15	320	320	10	20	10	40
VSC1717S	VA461	CoronaVac (2 dose+BNT162b2 booster)	50-59	M	2021-09-16	2021-10-15	320	320	160	320	160	320
VSC1718S	VA468	CoronaVac (2 dose+BNT162b2 booster)	30-39	F	2021-09-16	2021-10-15	40	160	5	20	10	40
VSC1720S	VA483	CoronaVac (2 dose+BNT162b2 booster)	50-59	F	2021-09-16	2021-10-15	320	320	10	40	10	40
VSC1721S	VA492	CoronaVac (2 dose+BNT162b2 booster)	30-39	F	2021-09-16	2021-10-15	320	320	10	40	10	20
VSC1722S	VA499	CoronaVac (2 dose+BNT162b2 booster)	60-69	M	2021-09-16	2021-10-15	320	320	5	20	5	5
VSC1725S	VA455	CoronaVac (2 dose+BNT162b2 booster)	40-49	M	2021-09-16	2021-10-15	320	320	10	40	10	40
VSC1726S	VA194	CoronaVac (2 dose+BNT162b2 booster)	50-59	F	2021-09-16	2021-10-18	320	320	40	160	80	160
VSC1729S	VA474	CoronaVac (2 dose+BNT162b2 booster)	50-59	M	2021-09-16	2021-10-18	160	320	10	20	20	40
VSC1348S	VA183	CoronaVac (2 dose+CoronaVac booster)	50-59	F	18/8/2021	2021-09-14	10	40	5	20	5	10
VSC1489S	VA038	CoronaVac (2 dose+CoronaVac booster)	50-59	F	18/8/2021	2021-09-17	10	40	5	5	5	5
VSC1495S	VA200	CoronaVac (2 dose+CoronaVac booster)	50-59	M	18/8/2021	2021-09-17	320	320	10	20	10	20
VSC1496S	VA206	CoronaVac (2 dose+CoronaVac booster)	50-59	F	18/8/2021	2021-09-17	5	20	5	5	5	5
VSC1503S	VA303	CoronaVac (2 dose+CoronaVac booster)	40-49	F	18/8/2021	2021-09-17	20	40	5	5	5	10
VSC1584S	VA401	CoronaVac (2 dose+CoronaVac booster)	60-69	F	18/8/2021	2021-09-23	20	80	5	10	5	10
VSC1590S	VA017	CoronaVac (2 dose+CoronaVac booster)	40-49	F	2021-08-24	2021-09-24	20	80	5	10	5	5
VSC1595S	VA182	CoronaVac (2 dose+CoronaVac booster)	60-69	M	2021-08-24	2021-09-24	5	20	5	5	5	10
VSC1598S	VA230	CoronaVac (2 dose+CoronaVac booster)	40-49	F	2021-08-24	2021-09-24	10	40	5	10	5	5
VSC1601S	VA342	CoronaVac (2 dose+CoronaVac booster)	50-59	F	2021-08-24	2021-09-24	5	20	5	10	5	10
VSC1602S	VA381	CoronaVac (2 dose+CoronaVac booster)	40-49	F	2021-08-18	2021-09-24	20	80	5	10	5	10
VSC1604S	VA391	CoronaVac (2 dose+CoronaVac booster)	30-39	F	2021-08-24	2021-09-24	40	80	5	10	5	20
VSC1683S	VA452	CoronaVac (2 dose+CoronaVac booster)	30-39	M	2021-09-16	2021-10-11	40	160	5	5	5	10
VSC1708S	VA022	CoronaVac (2 dose+CoronaVac booster)	40-49	F	2021-09-16	2021-10-15	40	160	5	20	5	10
VSC1709S	VA158	CoronaVac (2 dose+CoronaVac booster)	50-59	F	2021-09-16	2021-10-15	80	320	5	10	5	20
VSC1713S	VA443	CoronaVac (2 dose+CoronaVac booster)	50-59	M	2021-09-16	2021-10-15	10	40	5	5	5	10
VSC1716S	VA460	CoronaVac (2 dose+CoronaVac booster)	40-49	F	2021-09-16	2021-10-15	10	40	5	5	5	10
VSC1719S	VA469	CoronaVac (2 dose+CoronaVac booster)	50-59	F	2021-09-16	2021-10-15	10	40	5	5	5	10
VSC1724S	VA437	CoronaVac (2 dose+CoronaVac booster)	30-39	F	2021-09-16	2021-10-15	20	80	5	10	5	10
VSC1728S	VA453	CoronaVac (2 dose+CoronaVac booster)	40-49	F	2021-09-16	2021-10-18	40	160	5	5	5	5
PWH0231S	CV029	SARS-CoV-2 Convalescent	30-39	F	N.A.	2020-08-11	40	160	5	10	5	10
PWH0232S	CV045	SARS-CoV-2 Convalescent	70-79	M	N.A.	2020-08-11	40	160	5	20	5	20
PWH0233S	CV046	SARS-CoV-2 Convalescent	50-59	F	N.A.	2020-08-11	20	80	5	5	5	10
PWH0234S	CV053	SARS-CoV-2 Convalescent	60-69	M	N.A.	2020-08-11	40	160	5	10	5	20
PWH0250S	CV086	SARS-CoV-2 Convalescent	60-69	M	N.A.	2020-08-13	20	40	5	5	5	5
PWH0254S	CV002	SARS-CoV-2 Convalescent	60-69	F	N.A.	2020-08-13	10	40	5	5	5	20
PWH0390S	CV001	SARS-CoV-2 Convalescent	60-69	F	N.A.	2020-08-27	160	320	5	20	5	20
PWH0405S	CV022	SARS-CoV-2 Convalescent	20-29	M	N.A.	2020-09-04	20	80	5	10	5	10
PWH0406S	CV041	SARS-CoV-2 Convalescent	50-59	F	N.A.	2020-09-03	40	160	5	5	5	5
PWH0407S	CV049	SARS-CoV-2 Convalescent	30-39	F	N.A.	2020-09-04	20	80	5	5	5	5
PWH0414S	CV054	SARS-CoV-2 Convalescent	30-39	M	N.A.	2020-09-08	10	40	5	10	5	5
PWH0463S	CV069	SARS-CoV-2 Convalescent	60-69	M	N.A.	2020-09-18	20	80	5	5	5	5
PWH0465S	CV101	SARS-CoV-2 Convalescent	40-49	F	N.A.	2020-09-18	20	40	5	5	5	10
PWH0493S	CV084	SARS-CoV-2 Convalescent	30-39	F	N.A.	2020-09-24	20	80	5	10	5	10
PWH0496S	CV062	SARS-CoV-2 Convalescent	50-59	F	N.A.	2020-09-25	10	40	5	5	5	5
PWH0496S	CV062	SARS-CoV-2 Convalescent	50-59	F	N.A.	2020-09-25	10	40	5	5	5	5
PWH0497S	CV098	SARS-CoV-2 Convalescent	30-39	F	N.A.	2020-09-25	10	40	5	5	5	5
PWH0603S	CV201	SARS-CoV-2 Convalescent	30-39	F	N.A.	2021-01-08	10	20	5	5	5	10
PWH0683S	CV158	SARS-CoV-2 Convalescent	60-69	M	N.A.	2021-01-27	20	80	5	5	5	5
PWH0684S	CV159	SARS-CoV-2 Convalescent	50-59	F	N.A.	2021-01-27	80	320	80	160	10	40
5 = <1:10
320 = equal or more than 1:320
